# Supplementary material for: PTCY-Based Haploidentical Donor Transplantation versus HLA-Matched Related and Unrelated Donor Transplantations in Patients with Refractory or Relapsed Lymphoma—A Matched-Pair Analysis
Source: MDPI journal article supplement (doi:10.3390/cancers15215246), 2023-10-31
Supplement: s1 [file s1]

## Supplementary Material

**Supplementary Table S1. Engraftment after allo-HSCT.**

|                       | MRD (1)    | URD (2)   | Haplo (3)  | P value |        |         |
|-----------------------|------------|-----------|------------|---------|--------|---------|
|                       |            |           |            | 1 vs 3  | 2 vs 3 | Overall |
| ANC > 500/ $\mu$ l    |            |           |            |         |        |         |
| Median days (range)   | 14 (10-22) | 14 (9-41) | 18 (13-34) | 0.002   | 0.24   | 0.01    |
| PLT > 20,000/ $\mu$ l |            |           |            |         |        |         |
| Median days (range)   | 11 (6-22)  | 16 (5-26) | 27 (14-71) | <0.001  | <0.001 | <0.001  |

ANC, absolute neutrophil count; *Haplo*, haploidentical donor; *MRD*, matched related donor; *PLT*, platelets; *URD*, matched unrelated donor.

**Supplementary Table S2. Cumulative incidence of acute and chronic GvHD, disease relapse/progression and NRM**

|                                 | MRD (1)    | URD (2)    | Haplo (3)  | P value/Odd ratio |           |         |
|---------------------------------|------------|------------|------------|-------------------|-----------|---------|
|                                 |            |            |            | 1 vs 3            | 2 vs 3    | Overall |
| <b>aGvHD (II-IV) (95% CI)</b>   |            |            |            |                   |           |         |
| Day +100                        | 50 (48-52) | 44 (46-48) | 13 (12-14) | 0.03/0.15         | 0.04/0.17 | 0.06    |
| <b>cGvHD (moderate, severe)</b> |            |            |            |                   |           |         |
| 12 months                       | 50 (48-52) | 38 (36-40) | 6 (4-8)    | 0.01/0.06         | 0.04/0.12 | 0.04    |
| 18 months                       | 50 (48-52) | 38 (36-40) | 6 (4-8)    | 0.01/0.07         | 0.04/0.17 | 0.04    |
| 24 months                       | 50 (48-52) | 38 (36-40) | 13 (11-15) | 0.03/0.17         | 0.08/0.40 | 0.09    |
| <b>NRM, %</b>                   |            |            |            |                   |           |         |
| 1-year                          | 19 (18-20) | 44 (42-46) | 31 (29-33) | 0.93/1.50         | 0.43/0.64 | 0.66    |
| 3-year                          | 25 (23-27) | 44 (42-46) | 31 (29-33) | 0.90/1.25         | 0.43/0.82 | 0.67    |
| 5-year                          | 31 (29-33) | 44 (42-46) | 31 (29-33) | 0.87/0.86         | 0.43/0.71 | 0.69    |
| 10-year                         | 38 (36-40) | 44 (42-46) | 38 (36-40) | 0.89/1            | 0.41/0.86 | 0.64    |
| <b>Relapse/PD, %</b>            |            |            |            |                   |           |         |
| 1-year                          | 25 (24-26) | 13 (12-14) | 31 (30-32) | 0.76/2.08         | 0.51/2.5  | 0.82    |
| 3-year                          | 31 (29-33) | 25 (24-26) | 31 (30-32) | 0.77/1.33         | 0.56/1.04 | 0.85    |
| 5-year                          | 31 (29-33) | 31 (29-33) | 38 (36-40) | 0.77/1.68         | 0.55/0.96 | 0.84    |
| 10-year                         | 31 (29-33) | 31 (29-33) | 38 (36-40) | 0.77/1.6          | 0.55/0.8  | 0.84    |

*aGvHD*, acute graft-versus-host disease; *cGvHD*, chronic graft-versus-host disease; *Haplo*, haploidentical donor; *MRD*, matched related donor; *NRM*, non-relapse mortality; *PD*, progression of disease; *URD*, matched unrelated donor.

**Supplementary Table S3. Causes of death within the first 5 years after allo-HSCT**

|                         | MRD            | URD            | Haplo          |
|-------------------------|----------------|----------------|----------------|
| <b>No of deaths (%)</b> | <b>9 (100)</b> | <b>9 (100)</b> | <b>9 (100)</b> |
| Primary disease         | 4 (45)         | 2 (22)         | 4 (45)         |
| Infection               | 2 (22)         | 2 (22)         | 3 (33)         |
| GvHD                    | 3 (33)         | 5 (56)         | 1 (11)         |
| Toxicity                | 0              | 0              | 1 (11)         |

*GvHD*, graft-versus-host disease.

**Supplementary Table S4. Outcome after allo-HSCT.**

|                      | MRD (1)    | URD (2)    | Haplo (3)  |           | P value   |         |
|----------------------|------------|------------|------------|-----------|-----------|---------|
|                      |            |            |            | 1 vs 3    | 2 vs 3    | Overall |
| <b>OS (95% CI)</b>   |            |            |            |           |           |         |
| 1-year               | 63 (43-91) | 56 (37-87) | 63 (43-91) | 0.76/1    | 0.81/0.77 | 0.77    |
| 3-year               | 50 (31-82) | 50 (31-82) | 44 (25-76) | 0.86/1.3  | 0.92/1.3  | 0.85    |
| 5-year               | 44 (25-76) | 44 (25-76) | 44 (25-76) | 0.83/1    | 0.89/1    | 0.83    |
| 10-year              | 31 (15-65) | 44 (25-76) | 31 (15-65) | 0.92/1    | 0.87/1.22 | 0.88    |
| <b>PFS (95% CI)</b>  |            |            |            |           |           |         |
| 1-year               | 56 (37-87) | 44 (25-76) | 38 (20-71) | 0.72/2.14 | 0.91/1.30 | 0.71    |
| 3-year               | 44 (25-76) | 31 (15-65) | 38 (20-71) | 0.77/1.3  | 0.85/0.76 | 0.77    |
| 5-year               | 38 (20-71) | 25 (11-58) | 31 (15-65) | 0.75/1.32 | 0.86/0.73 | 0.74    |
| 10-year              | 31 (15-65) | 25 (11-58) | 25 (11-58) | 0.71/1.45 | 0.85/0.67 | 0.71    |
| <b>GRFS (95% CI)</b> |            |            |            |           |           |         |
| 1-year               | 25 (11-58) | 25 (11-58) | 38 (20-71) | 0.36/0.56 | 0.08/0.56 | 0.39    |
| 3-year               | 19 (7-52)  | 19 (7-52)  | 31 (15-65) | 0.34/0.51 | 0.09/0.51 | 0.37    |
| 5-year               | 19 (7-52)  | 13 (3-46)  | 31 (15-65) | 0.34/0.51 | 0.09/0.31 | 0.37    |
| 10-year              | 19 (7-52)  | 13 (3-46)  | 25 (11-58) | 0.34/0.92 | 0.11/0.86 | 0.38    |
| <b>CRFS (95% CI)</b> |            |            |            |           |           |         |
| 1-year               | 25 (11-58) | 25 (11-58) | 38 (20-71) | 0.43/0.56 | 0.14/0.56 | 0.43    |
| 3-year               | 19 (7-52)  | 19 (7-52)  | 31 (15-65) | 0.41/0.51 | 0.15/0.51 | 0.41    |
| 5-year               | 19 (7-52)  | 13 (3-46)  | 31 (15-65) | 0.40/0.51 | 0.14/0.31 | 0.40    |
| 10-year              | 19 (7-52)  | 13 (3-46)  | 25 (11-58) | 0.42/0.92 | 0.17/0.86 | 0.42    |

*CI*, confidence interval; *CRFS*, chronic graft-versus-host disease, relapse-free survival; *GRFS*, graft-versus-host disease, relapse-free survival; *Haplo*, haploidentical donor; *MRD*, matched related donor; *OS*, overall survival; *PFS*, progression-free survival; *URD*, matched unrelated donor.
